# Supplementary material for: A rabies lesson improves rabies knowledge amongst primary school children in Zomba, Malawi
Source: PubMed Central journal article supplement (PMC5862537; doi:10.1371/journal.pntd.0006293), 2018-03-09

# Distribution of Missing Data

Figures showing the distribution of missing data for each questionnaire type; pre, post, retention and control.

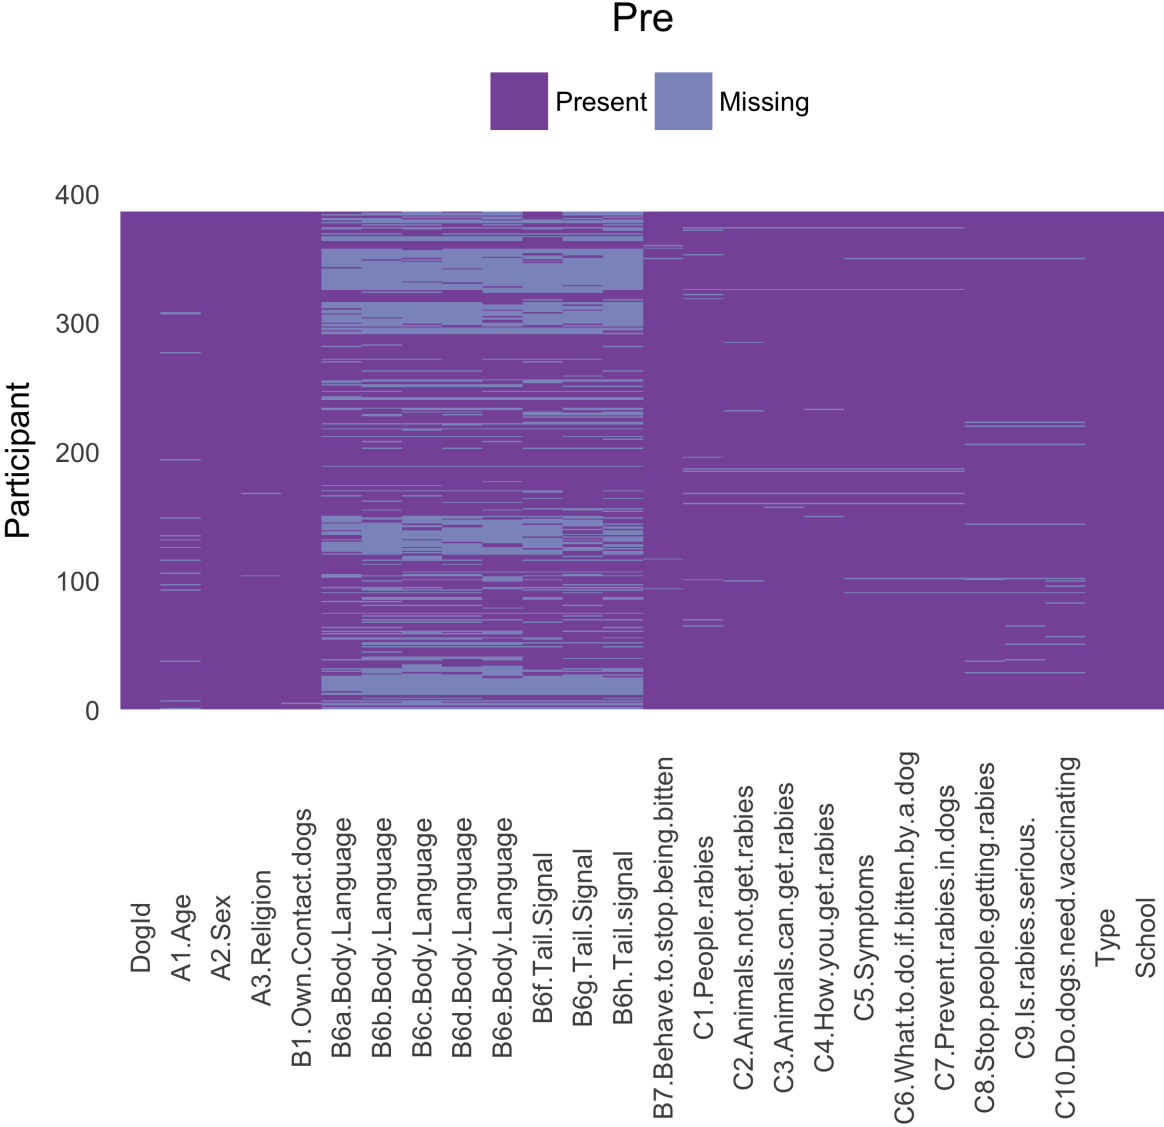

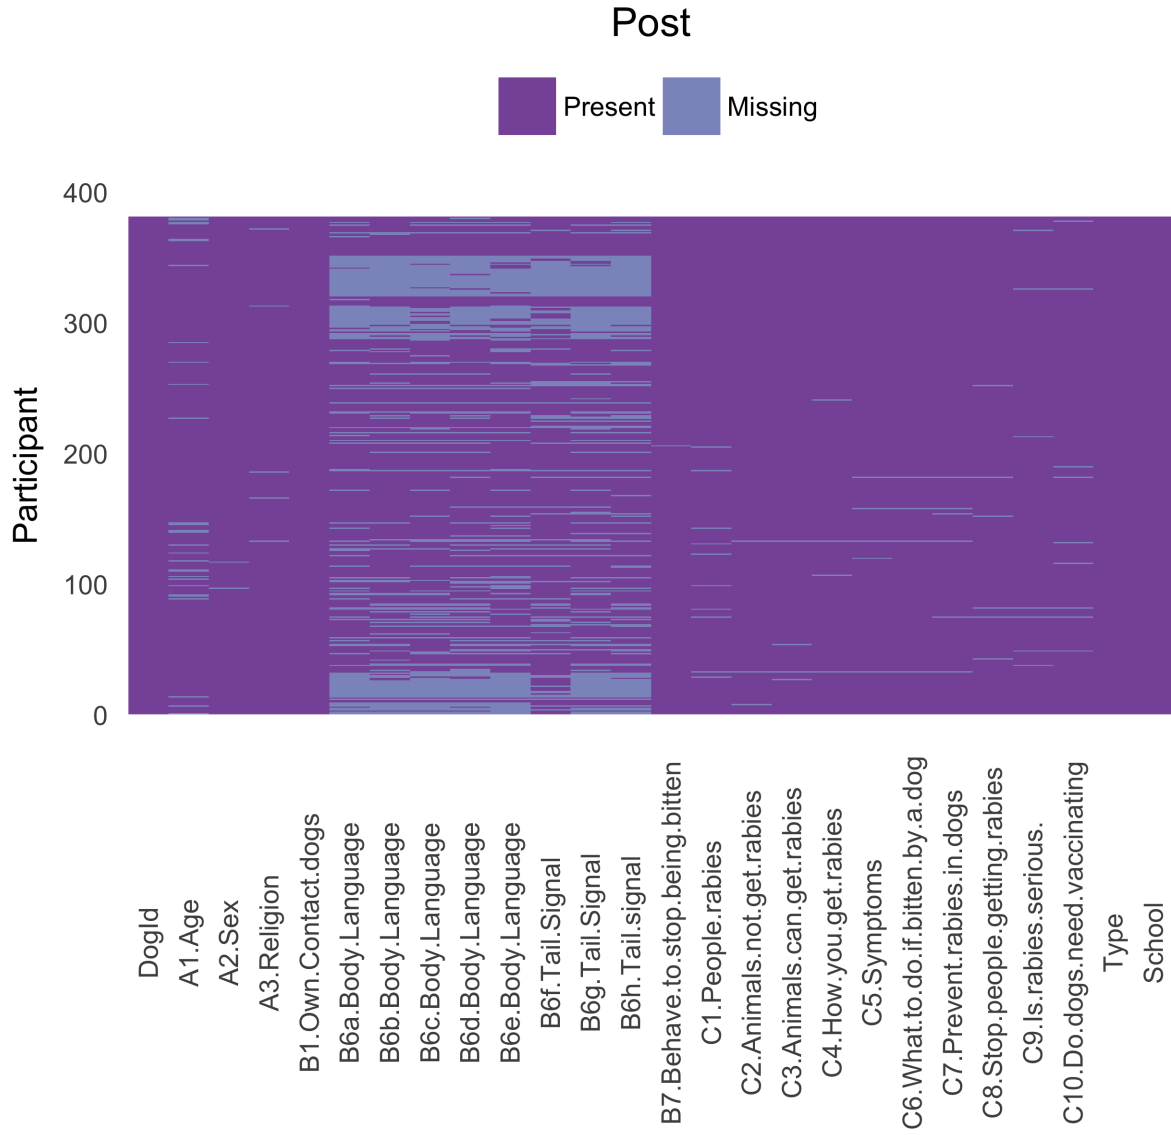

# Retention

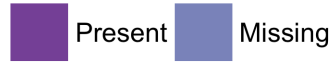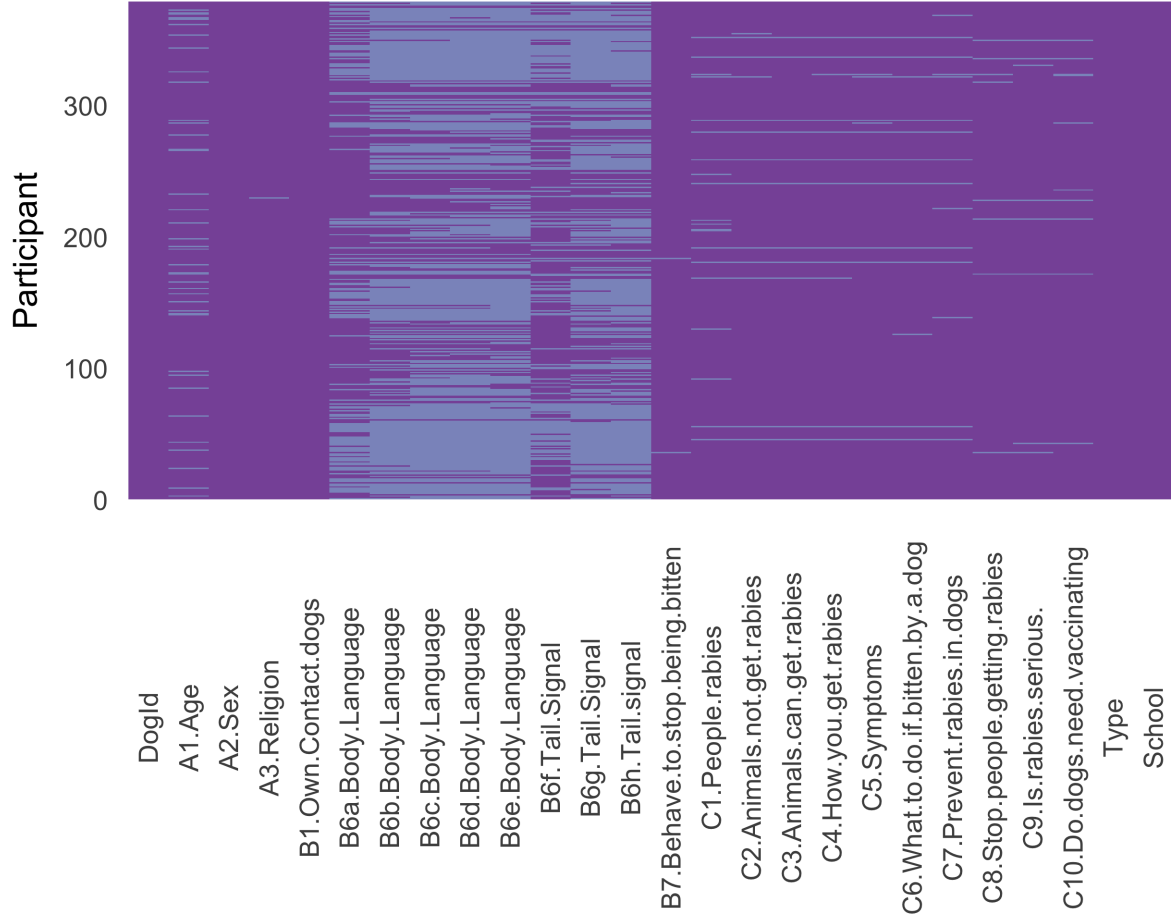

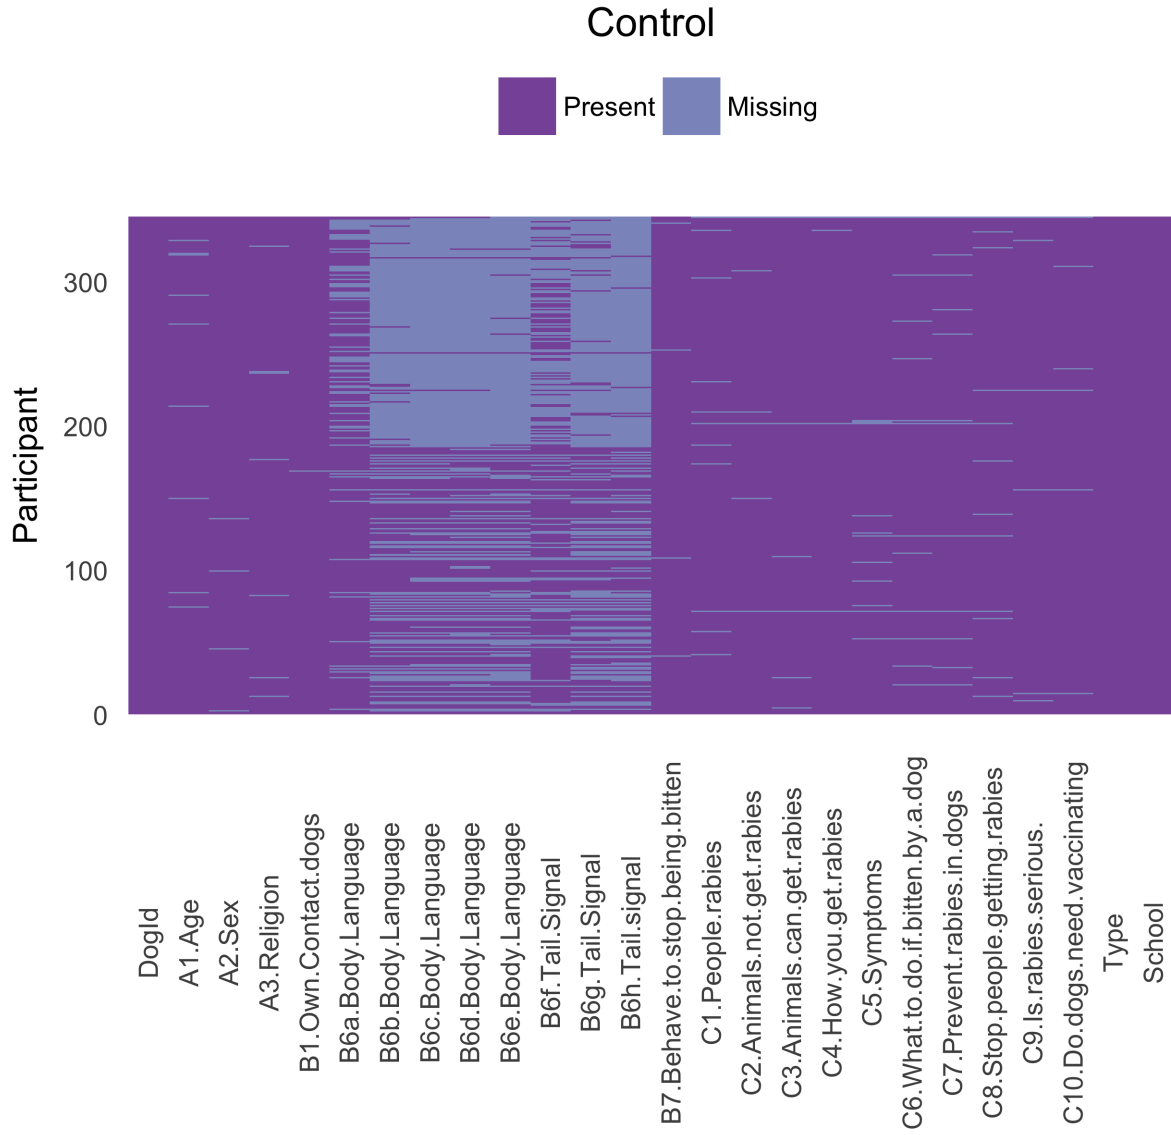

Supplement: pntd.0006293.s002.pdf [file pntd.0006293.s002.pdf]
