# Supplementary material for: A rabies lesson improves rabies knowledge amongst primary school children in Zomba, Malawi
Source: PubMed Central journal article supplement (PMC5862537; doi:10.1371/journal.pntd.0006293), 2018-03-09

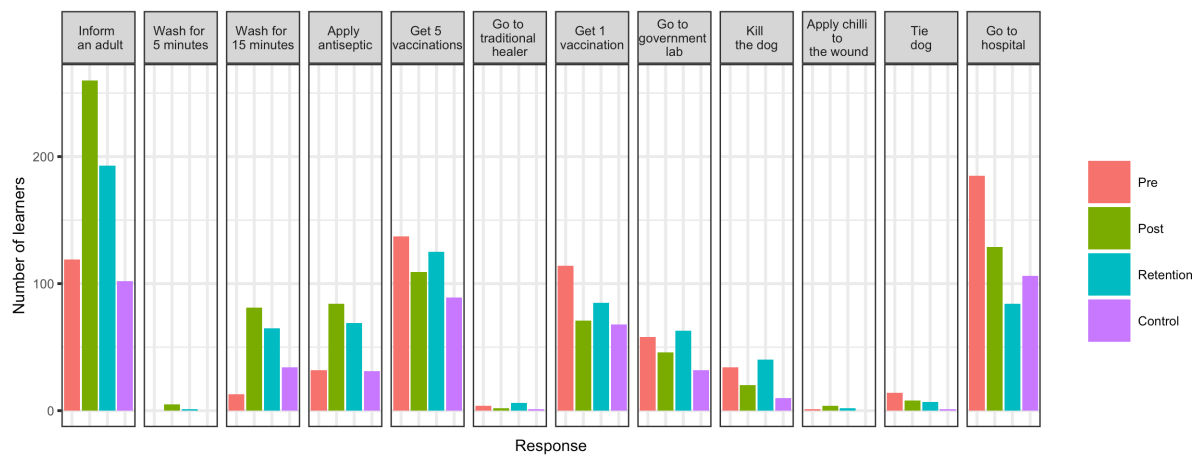

Supplement: pntd.0006293.s005.pdf [file pntd.0006293.s005.pdf]
